# Supplementary material for: Conjugal inflammatory bowel disease: a systematic review and European survey
Source: PubMed Central journal article supplement — Ann Gastroenterol. 2021 Feb 26;34(3):361–9. doi: 10.20524/aog.2021.0598 (PMC8079879; doi:10.20524/aog.2021.0598), 2021-02-26
Supplement: AnnGastroenterol-34-361_Suppl1.pdf [file AnnGastroenterol-34-361_Suppl1.pdf]

## Supplementary material

**Supplementary Table 1** Country of birth and residence of couples included in the web survey (n=58)

| Country         | Country of birth <sup>a</sup><br>n (%) | Country of residence <sup>b</sup> n (%) |
|-----------------|----------------------------------------|-----------------------------------------|
| Italy           | 26                                     | 25                                      |
| Portugal        | 11                                     | 11                                      |
| Spain           | 7                                      | 7                                       |
| Netherlands     | 3                                      | 3                                       |
| Belgium         | 2                                      | 3                                       |
| Ireland         | 2                                      | 2                                       |
| Australia       | 1                                      | 1                                       |
| Malta           | 2                                      | 2                                       |
| Belgium-Romania | 1                                      | 0                                       |
| Portugal-Angola | 1                                      | 0                                       |
| Portugal-Brazil | 1                                      | 0                                       |
| France          | 0                                      | 1                                       |

Missing data from: <sup>a</sup>1 couple, <sup>b</sup>3 couples

**Supplementary Table 2** Demographic and clinical characteristics of children included in the web survey

| Children | Sex     | IBD | IBD in parents | Other IMID in parents | Age of diagnosis | Smoking habits | Delivery mode | Breast-feeding | Exposure to antibiotics |
|----------|---------|-----|----------------|-----------------------|------------------|----------------|---------------|----------------|-------------------------|
| Child 1  | Female  | CD  | CD-UC          | Yes                   | 15               | Never          | C-section     | No             | No                      |
| Child 2  | Female  | CD  | CD-IC          | No                    | 15               | Never          | Vaginal       | 6-12M          | Yes                     |
| Child 3  | Female  | UC  | UC-UC          | Yes-No                | 7                | Never          | Vaginal       | No             | Yes                     |
| Child 4  | Female  | UC  | UC-UC          | No                    | 14               | Never          | Vaginal       | 6-12M          | Yes                     |
| Child 5  | Female  | UC  | CD-UC          | No                    | 17               | Never          | Vaginal       | 6-12M          | Yes                     |
| Child 6  | Missing | IC  | CD-UC          | No                    | Missing          | Ever           | Missing       | Missing        | Missing                 |

CD, Crohn's disease; IBD, inflammatory bowel disease; IC, indeterminate colitis; IMID, immune-mediated disease; M, months; UC, ulcerative colitis

**Supplementary Table 3** Predictive factors for developing inflammatory bowel disease in children (n=65)

| Factors                                     | Children with IBD (n=6) | Children without IBD (n=59) | P-value |
|---------------------------------------------|-------------------------|-----------------------------|---------|
| Delivery mode, n (%)                        |                         |                             |         |
| Vaginal                                     | 4 (80%)                 | 40 (71%)                    | 0.999   |
| C-section                                   | 1 (20%)                 | 16 (29%)                    |         |
| Breast-feeding, n (%) <sup>b</sup>          | 3 (60%)                 | 46 (79%)                    | 0.307   |
| Exposure to antibiotics, n (%) <sup>b</sup> | 4 (80%)                 | 40 (69%)                    | 0.999   |
| Other IMID in parents, n (%)                |                         |                             |         |
| One or both parents                         | 2 (33%)                 | 26 (44%)                    | 0.692   |
| Both parents                                | 1 (17%)                 | 8 (14%)                     | 0.999   |

IBD, inflammatory bowel disease; IMID, immune-mediated disease. Missing data from: <sup>a</sup>4 children, <sup>b</sup>2 children

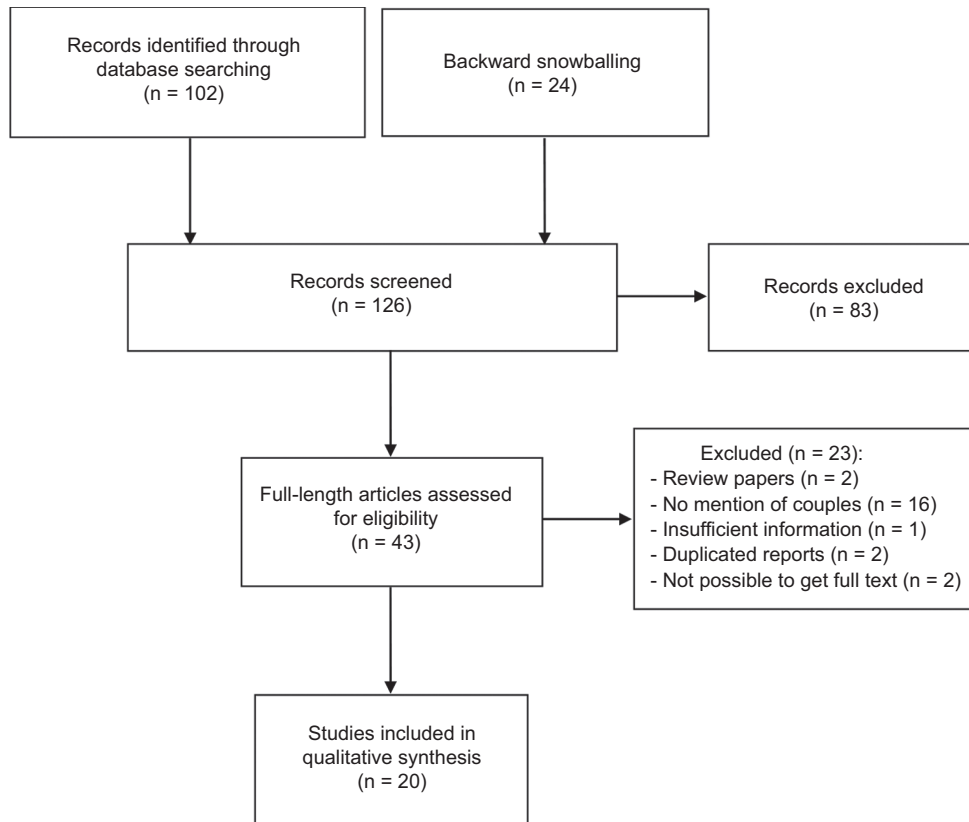

Supplementary Figure 1 PRISMA diagram detailing the literature search
